# Supplementary material for: A dichromatic plasmonic ELISA CD81 protein sensor for ultrasensitive detection of preeclampsia
Source: Royal Society of Chemistry journal article supplement (doi:10.1039/d3an00213f), 2023-01-01
Supplement: d3an00213f1.pdf [file d3an00213f1.pdf]

## **Dichromatic plasmonic ELISA CD81 protein sensor for ultrasensitive detection of preeclampsia**

Kexuan Chen<sup>a,1</sup>, Nan Ma<sup>a</sup>, Haobo Sun<sup>a</sup>, Xueji Zhang<sup>b</sup>, Jinming Kong<sup>a, \*</sup>

<sup>a</sup> School of Environmental and Biological Engineering, Nanjing University of Science and Technology, Nanjing Jiangsu 210094, P. R. China.

<sup>b</sup> School of Biomedical Engineering, Shenzhen University Health Science Center, Shenzhen Guangdong 518060, P. R. China.

\* Corresponding author. E-mail addresses: j. kong@njust.edu.cn (J. Kong)

## Materials and reagents

All chemical reagents used in the experiment have reached analytical purity or higher. Obtained ultrapure water ( $\geq 18.25$  M $\Omega$ /cm) through Milli-Q purification systems (purchased from Sigma-Aldrich Chemical Co., Ltd. in the United States). Human CD81 protein, the probes, and 96 well polystyrene plates used to specifically capture the target protein CD81 were acquired from GenScript Biotechnology Co., Ltd. CD81 antibody (B-11) conjugate of horse radish peroxidase (HRP), were purchased from Santa Cruz Biotechnology. The Trisodium citrate dihydrate is from Yuanye Bio-Technology Co., Ltd., and NMP is purchased from Innochem Technology Co., Ltd. The Gold chloride trihydrate solution is purchased from Aladdin Co., Ltd. The solvent for protein and antibodies is PBS buffer, prepared by dry powder, which is purchased from Solarbio Co., Ltd. 2-[4-(2-hydroxyethyl)-1-piperazinyl] ethane sulfonic acid (HEPES) was supplied from Sigma Aldrich (Shanghai) Trading Co., Ltd.

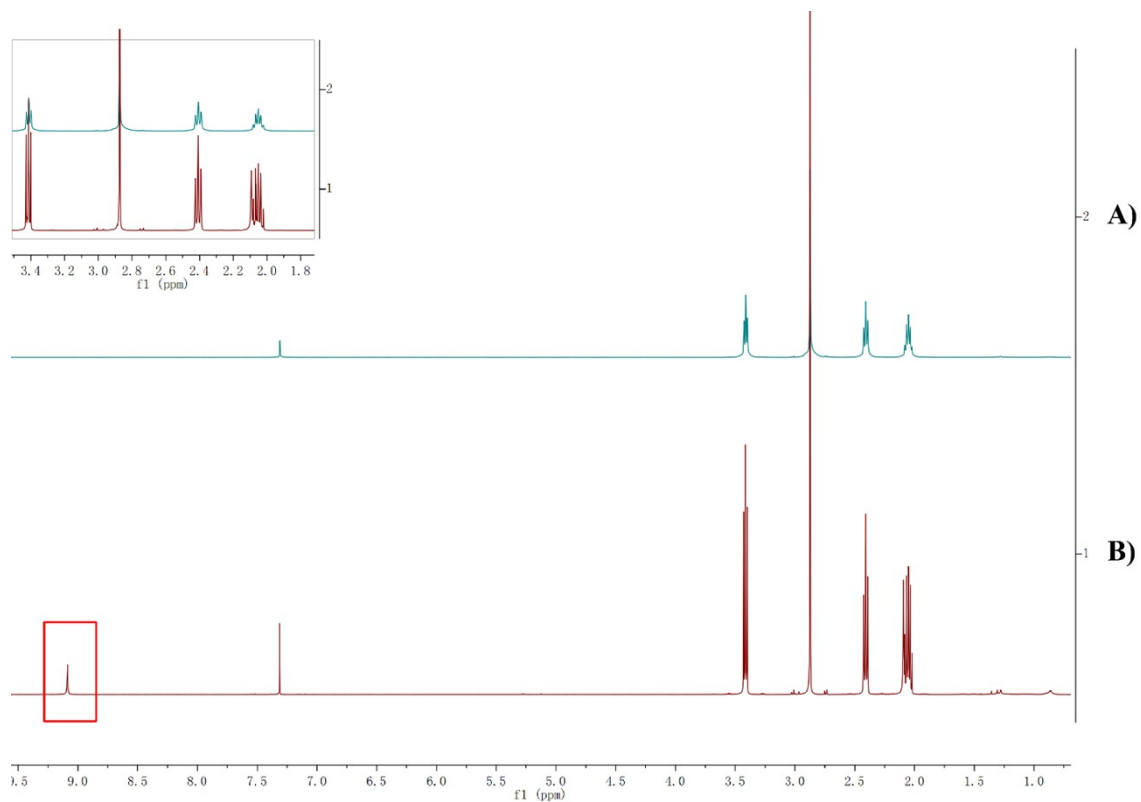

**Fig. S1.**  $^1\text{H}$  NMR spectra of (A) pure NMP, (B) mixture of NMP and  $\text{H}_2\text{O}_2$ .

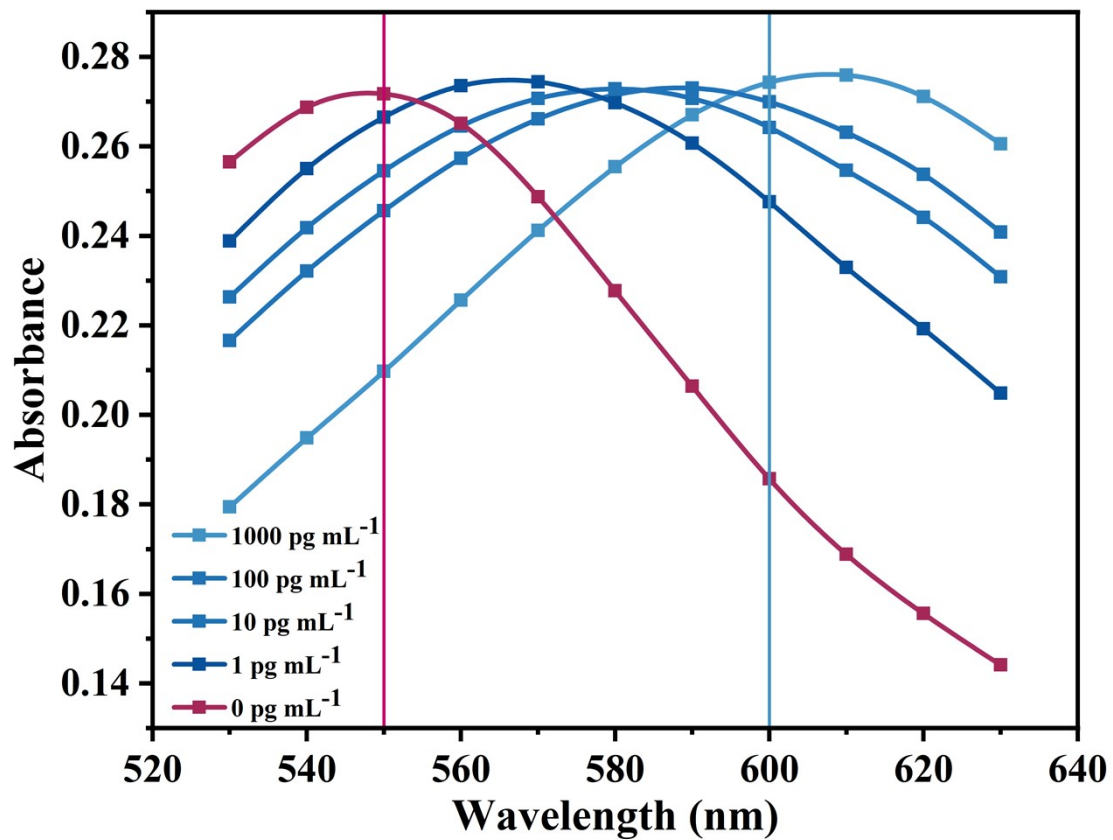

Fig. S2. With different concentrations of CD81, the absorbance of the solution at 550 nm and 600 nm were changed regularly.

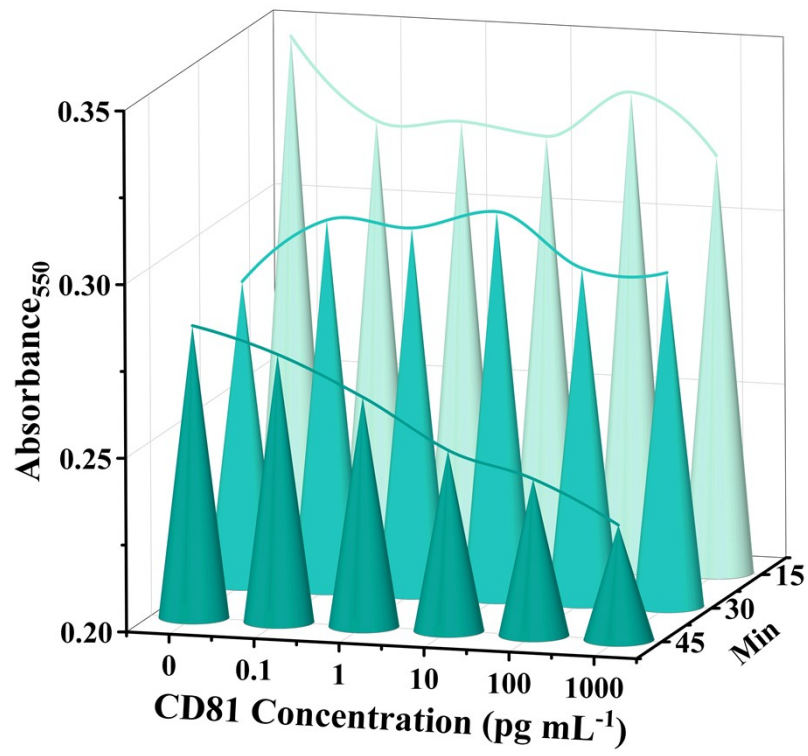

Fig. S3. Typical absorbance at different incubation times.

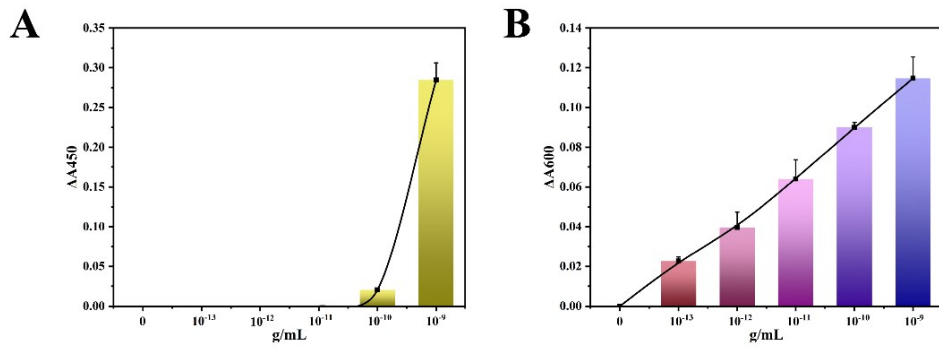

**Fig. S4.** Quantitative performance of conventional ELISA (A) and plasmonic ELISA (B): the decreased value of corresponding peak absorbance readings versus CD81 concentrations. Error bars are standard deviations of three repetitive experiments.

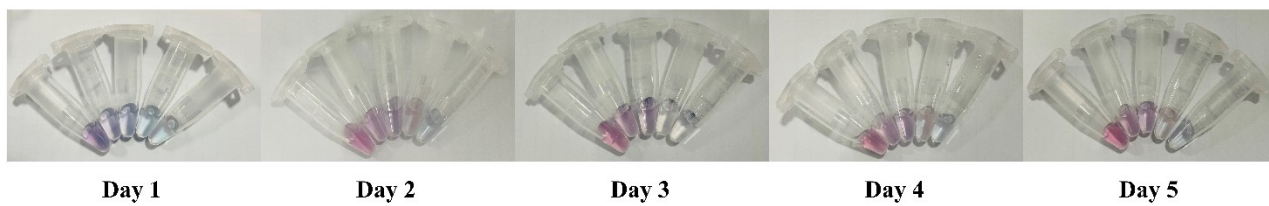

**Fig. S5.** Storage stability performance. Color change of AuNPs solution in five days.
